# Supplementary material for: Economic and Environmental Analysis of Woody Biomass Power Generation Using Forest Residues and Demolition Debris in Japan without Assuming Carbon Neutrality
Source: MDPI journal article supplement (doi:10.3390/f14010148), 2023-01-12
Supplement: s1 [file s1]

Archive with 1 entries (1 files):
- forests-2150994-supplementary.pdf
