# Supplementary material for: Economic and Environmental Analysis of Woody Biomass Power Generation Using Forest Residues and Demolition Debris in Japan without Assuming Carbon Neutrality
Source: MDPI journal article supplement (doi:10.3390/f14010148), 2023-01-12
Supplement: s1 [file s1 › forests-2150994-supplementary.pdf]

**Table S1.** Ripple effects in Gifu prefecture (unit: million JPY).

| Sector                                            | Positive Effects of<br>the Construction<br>(one time) | Operations<br>(annual) | Negative Effects of the<br>Operations<br>(annual) |
|---------------------------------------------------|-------------------------------------------------------|------------------------|---------------------------------------------------|
| Agricultural products                             | 2.87                                                  | 1.51                   | -1.09                                             |
| Livestock raising and sericulture                 | 0.79                                                  | 0.52                   | -0.38                                             |
| Agricultural services                             | 0.55                                                  | 0.32                   | -0.24                                             |
| Forestry                                          | 0.46                                                  | 51.48                  | -0.12                                             |
| Fishing                                           | 0.00                                                  | 0.00                   | -0.00                                             |
| Mining                                            | 2.96                                                  | 1.28                   | -9.77                                             |
| Food                                              | 8.10                                                  | 5.39                   | -3.78                                             |
| Textiles                                          | 1.16                                                  | 1.20                   | -0.40                                             |
| Pulp, paper, and wooden products                  | 12.07                                                 | 512.31                 | -2.04                                             |
| Chemical products                                 | 1.40                                                  | 3.47                   | -0.56                                             |
| Petroleum and coal products                       | 1.08                                                  | 0.87                   | -0.79                                             |
| Ceramic, stone, and clay products                 | 21.95                                                 | 3.68                   | -2.29                                             |
| Steel and steel products                          | 2.43                                                  | 0.95                   | -0.26                                             |
| Non-steel metals and products                     | 0.23                                                  | 0.08                   | -0.05                                             |
| Other metal products                              | 19.56                                                 | 3.83                   | -2.20                                             |
| General machinery                                 | 2.27                                                  | 0.98                   | -0.58                                             |
| Electric machinery                                | 1.48                                                  | 0.39                   | -0.37                                             |
| Information and communication electronics devices | 1.17                                                  | 0.54                   | -0.43                                             |
| Electronic component                              | 0.78                                                  | 0.41                   | -0.38                                             |
| Transportation equipment                          | 2.39                                                  | 1.56                   | -1.33                                             |
| Precision instruments                             | 0.38                                                  | 0.24                   | -0.13                                             |
| Other manufactured products                       | 6.53                                                  | 7.11                   | -3.48                                             |
| Construction                                      | 607.86                                                | 18.36                  | -54.42                                            |
| Electricity and gas                               | 19.74                                                 | 29.49                  | -834.70                                           |
| City water, thermal energy supply, and others     | 7.59                                                  | 5.42                   | -6.01                                             |
| Commerce                                          | 383.53                                                | 257.95                 | -32.37                                            |
| Financial and insurance                           | 62.60                                                 | 48.26                  | -49.18                                            |
| Real estate                                       | 86.89                                                 | 56.76                  | -45.56                                            |
| Transport                                         | 107.64                                                | 128.56                 | -30.83                                            |
| Communication and broadcasting                    | 26.13                                                 | 17.51                  | -16.83                                            |
| Public services                                   | 2.98                                                  | 2.01                   | -1.47                                             |
| Education and research                            | 10.71                                                 | 10.04                  | -31.13                                            |
| Medical and health service                        | 14.43                                                 | 9.12                   | -6.74                                             |
| Other non-profit organizations                    | 6.53                                                  | 4.30                   | -3.96                                             |
| Other business services                           | 74.54                                                 | 46.95                  | -54.99                                            |
| Other personal services                           | 41.38                                                 | 26.10                  | -19.31                                            |
| Office supplies                                   | 2.90                                                  | 2.34                   | -1.12                                             |
| Unclassified                                      | 7.29                                                  | 5.06                   | -3.69                                             |
| Total                                             | 1,553.34                                              | 1,266.35               | -1222.97                                          |

**Table S2.** Ripple effects for areas outside Gifu prefecture (unit: million JPY).

| Sector                                            | Positive Effects of<br>Construction<br>(one time) | Operations<br>(annual) | Negative Effects of the<br>Operations<br>(annual) |
|---------------------------------------------------|---------------------------------------------------|------------------------|---------------------------------------------------|
| Agricultural products                             | 0.45                                              | 0.28                   | −0.21                                             |
| Livestock raising and sericulture                 | 0.06                                              | 0.04                   | −0.03                                             |
| Agricultural services                             | 0.00                                              | 0.00                   | 0.00                                              |
| Forestry                                          | 0.02                                              | 0.01                   | −0.01                                             |
| Fishing                                           | 0.16                                              | 0.10                   | −0.08                                             |
| Mining                                            | −0.01                                             | 0.00                   | 0.00                                              |
| Food                                              | 16.68                                             | 10.54                  | −7.79                                             |
| Textiles                                          | 1.79                                              | 1.13                   | −0.83                                             |
| Pulp, paper, and wooden products                  | 0.06                                              | 28.22                  | −0.03                                             |
| Chemical products                                 | 1.59                                              | 1.01                   | −0.74                                             |
| Petroleum and coal products                       | 6.42                                              | 4.05                   | −3.00                                             |
| Ceramic, stone, and clay products                 | 0.12                                              | 0.08                   | −0.06                                             |
| Steel and steel products                          | −0.04                                             | −0.02                  | 0.02                                              |
| Non-steel metals and products                     | 0.08                                              | 0.05                   | −0.04                                             |
| Other metal products                              | 0.15                                              | 0.10                   | −0.07                                             |
| General machinery                                 | 1680.71                                           | 0.03                   | −0.02                                             |
| Electric machinery                                | 1.45                                              | 0.91                   | −0.68                                             |
| Information and communication electronics devices | 1.42                                              | 0.89                   | −0.66                                             |
| Electronic component                              | 0.10                                              | 0.07                   | −0.05                                             |
| Transportation equipment                          | 5.26                                              | 3.32                   | −2.46                                             |
| Precision instruments                             | 0.53                                              | 0.33                   | −0.25                                             |
| Other manufactured products                       | 1.62                                              | 1.02                   | −0.76                                             |
| Construction                                      | 0.00                                              | 0.00                   | 0.00                                              |
| Electricity and gas                               | 0.24                                              | 0.15                   | −39.73                                            |
| City water, thermal energy supply, and others     | 0.00                                              | 50.25                  | 0.00                                              |
| Commerce                                          | 157.75                                            | 23.24                  | −9.64                                             |
| Financial and insurance                           | 1.54                                              | 0.97                   | −0.72                                             |
| Real estate                                       | 2.14                                              | 1.35                   | −1.00                                             |
| Transport                                         | 7.31                                              | 11.01                  | −1.16                                             |
| Communication and broadcasting                    | 4.15                                              | 2.62                   | −1.94                                             |
| Public services                                   | 0.00                                              | 0.00                   | 0.00                                              |
| Education and research                            | 0.42                                              | 0.27                   | −0.20                                             |
| Medical and health service                        | 0.02                                              | 0.01                   | −0.01                                             |
| Other non-profit organizations                    | 0.03                                              | 0.02                   | −0.01                                             |
| Other business services                           | 1.74                                              | 1.10                   | −0.81                                             |
| Other personal services                           | 4.87                                              | 3.07                   | −2.27                                             |
| Office supplies                                   | 0.00                                              | 0.00                   | 0.00                                              |
| Unclassified                                      | 0.00                                              | 0.00                   | 0.00                                              |
| Total                                             | 1,898.84                                          | 146.23                 | −75.23                                            |
